# Supplementary material
Source: publisher figshare collection journal article supplement (https://gsajournals.figshare.com/articles/dataset/_/12356567)
Supplement: Supplementary file 1 [file 2]

# An unusual amino acid substitution within hummingbird cytochrome c oxidase alters a key proton-conducting channel

Cory D. Dunn, Bala Anı Akpınar, and Vivek Sharma

## SUPPLEMENTAL LITERATURE CITED

Kumar, S., G. Stecher, M. Li, C. Knyaz, and K. Tamura, 2018 MEGA X: Molecular Evolutionary Genetics Analysis across Computing Platforms. *Mol. Biol. Evol.* 35: 1547–1549.

Sann, M., O. Niehuis, R. S. Peters, C. Mayer, A. Kozlov *et al.*, 2018 Phylogenomic analysis of Apoidea sheds new light on the sister group of bees. *BMC Evol. Biol.* 18: 71.

Stecher, G., K. Tamura, and S. Kumar, 2020 Molecular Evolutionary Genetics Analysis (MEGA) for macOS. *Mol. Biol. Evol.* 37: 1237–1239.

Tamura, K., and M. Nei, 1993 Estimation of the number of nucleotide substitutions in the control region of mitochondrial DNA in humans and chimpanzees. *Mol. Biol. Evol.* 10: 512–526.
